# Supplementary material for: Benzofuran and Benzo[b]thiophene‐2‐Carboxamide Derivatives as Modulators of Amyloid Beta (Aβ42) Aggregation
Source: PubMed Central journal article supplement (PMC11581421; doi:10.1002/cmdc.202400198), 2024-09-30
Supplement: CMDC-19-e202400198-s001.pdf [file CMDC-19-e202400198-s001.pdf]

# ChemMedChem

Supporting Information

## **Benzofuran and Benzo[*b*]thiophene-2-Carboxamide Derivatives as Modulators of Amyloid Beta (A $\beta$ 42) Aggregation**

Yusheng Zhao, Kartar Singh, Rahul Chowdary Karuturi, Ahmed A. Hefny, Arash Shakeri, Mike A. Beazely, and Praveen P. N. Rao\*

## Supporting Information

### **Benzofuran and Benzo[*b*]thiophene-2-carboxamide Derivatives as Modulators of Amyloid Beta (A $\beta$ 42) Aggregation**

Yusheng Zhao,<sup>[a]</sup> Kartar Singh,<sup>[a]</sup> Rahul Chowdary Karuturi,<sup>[a]</sup> Ahmed A. Hefny,<sup>[a]</sup> Arash Shakeri,<sup>[a]</sup> Mike A. Beazely,<sup>[a]</sup> Praveen P. N. Rao\*<sup>[a]</sup>

---

*Corresponding author:* Praveen P. N. Rao, Tel: +1 519 888 4567 ext: 21317; e-mail:

[praveen.nekkar@uwaterloo.ca](mailto:praveen.nekkar@uwaterloo.ca)

<sup>[a]</sup> School of Pharmacy, Health Sciences Campus, University of Waterloo, 200 University Avenue West, Waterloo, Ontario, Canada N2L 3G1

## Contents

|     |                                                                                                                       |    |
|-----|-----------------------------------------------------------------------------------------------------------------------|----|
| 1.  | Analytical data for <i>N</i> -(3-hydroxy-4-methoxyphenyl)benzofuran-2-carboxamide ( <b>4a</b> ).....                  | 3  |
| 2.  | Analytical data for <i>N</i> -(4-hydroxy-3-methoxyphenyl)benzofuran-2-carboxamide ( <b>4b</b> ) .....                 | 5  |
| 3.  | Analytical data for <i>N</i> -(3,4-dimethoxyphenyl)benzofuran-2-carboxamide ( <b>4c</b> ).....                        | 7  |
| 4.  | Analytical data for <i>N</i> -(4-methoxyphenyl)benzofuran-2-carboxamide ( <b>4d</b> ) .....                           | 8  |
| 5.  | Analytical data for <i>N</i> -(3-hydroxy-4-methoxyphenyl)benzo[ <i>b</i> ]thiophene-2-carboxamide ( <b>5a</b> ) ..... | 9  |
| 6.  | Analytical data for <i>N</i> -(4-hydroxy-3-methoxyphenyl)benzo[ <i>b</i> ]thiophene-2-carboxamide ( <b>5b</b> ).....  | 11 |
| 7.  | Analytical data for <i>N</i> -(3,4-dimethoxyphenyl)benzo[ <i>b</i> ]thiophene-2-carboxamide ( <b>5c</b> )....         | 13 |
| 8.  | Analytical data for <i>N</i> -(4-methoxyphenyl)benzo[ <i>b</i> ]thiophene-2-carboxamide ( <b>5d</b> ) .....           | 14 |
| 9.  | ThT-based aggregation kinetics background readings.....                                                               | 15 |
| 10. | Effect of test compounds on preformed A $\beta$ 42 fibrils.....                                                       | 15 |
| 11. | Congo red UV assay for compounds <b>4b</b> , <b>4d</b> , <b>5b</b> , <b>5d</b> and resveratrol (RVT).....             | 17 |
| 12. | Physicochemical properties of compounds <b>4a–d</b> and <b>5a–d</b> .....                                             | 18 |

# 1. Analytical data for *N*-(3-hydroxy-4-methoxyphenyl)benzofuran-2-carboxamide (4a)

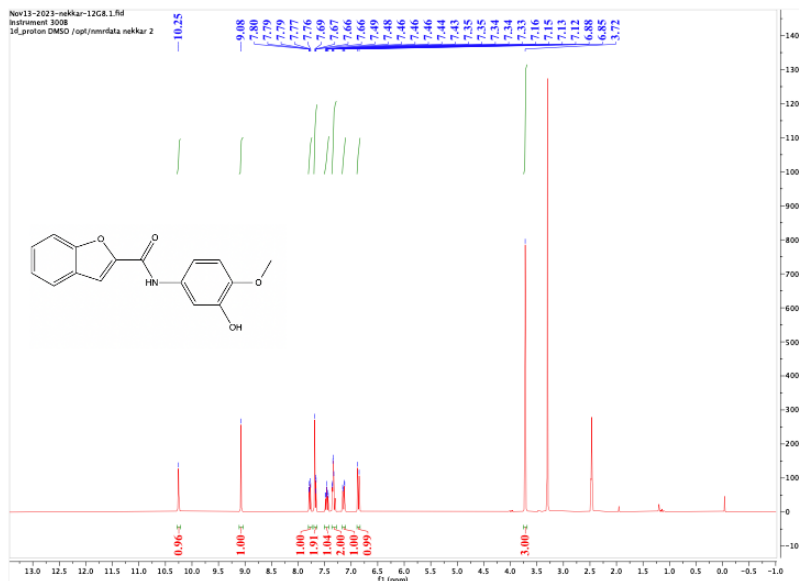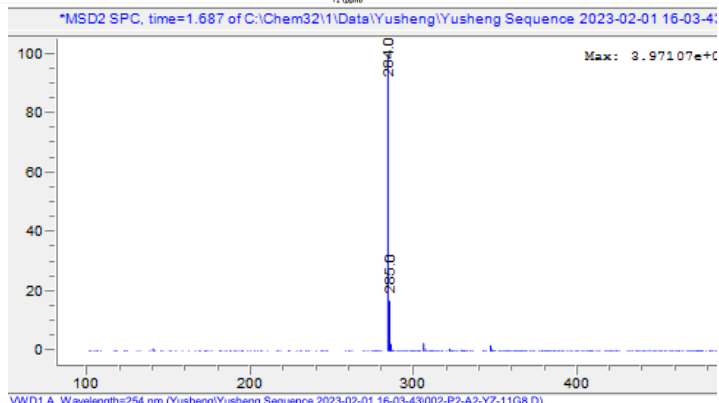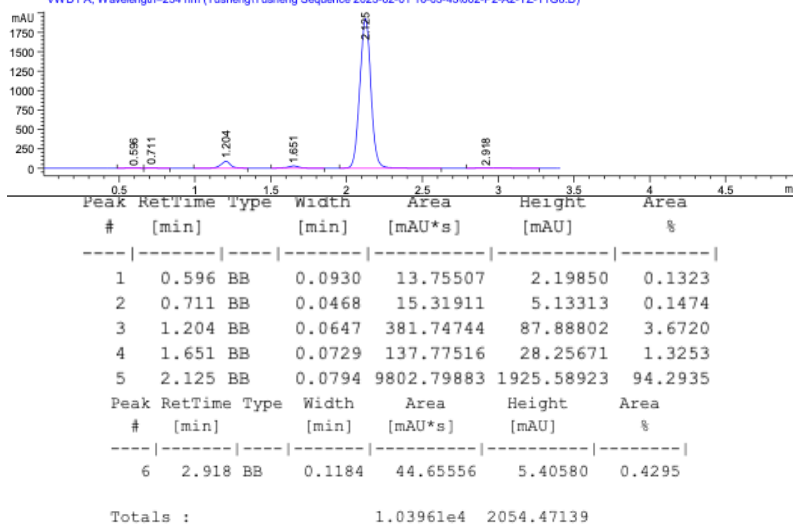

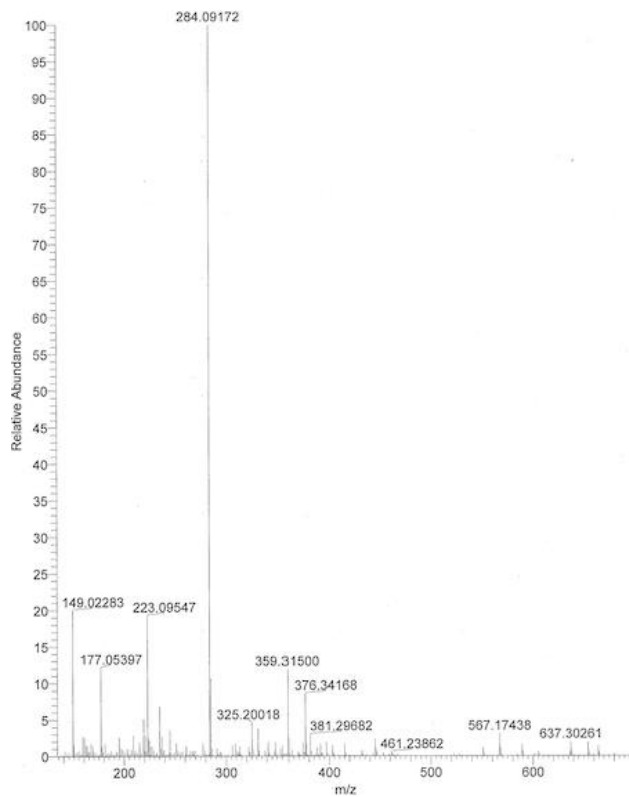

## 2. Analytical data for *N*-(4-hydroxy-3-methoxyphenyl)benzofuran-2-carboxamide (4b)

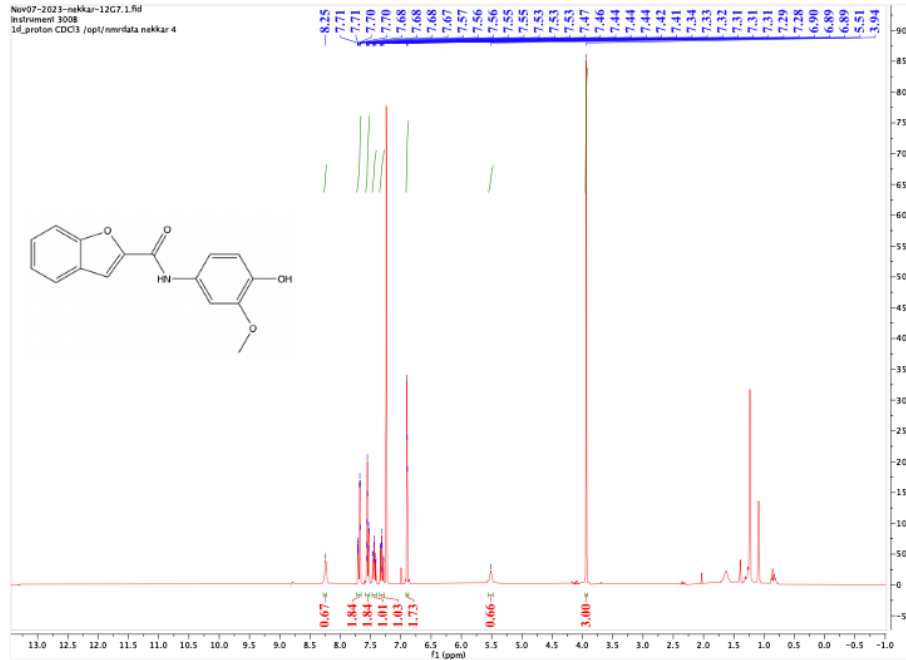

\*MSD2 SPC, time=1.615 of C:\Chem32\1\Data\Yusheng\Yusheng Sequence 2023-02-01 16-03-43\0

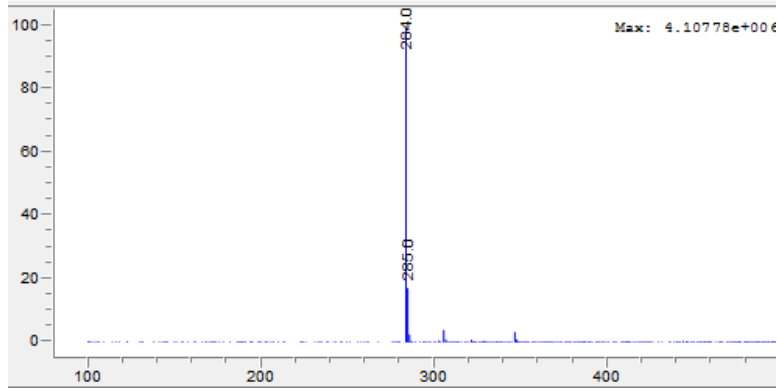

VWD1 A, Wavelength=254 nm (Yusheng\Yusheng Sequence 2023-02-01 16-03-43\001-P2-A1-YZ-11G7.D)

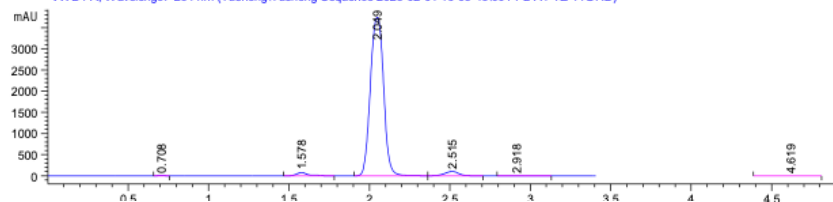

| Peak # | RetTime [min] | Type | Width [min] | Area [mAU*s] | Height [mAU] | Area %  |
|--------|---------------|------|-------------|--------------|--------------|---------|
| 1      | 0.708         | BB   | 0.0430      | 15.61483     | 5.87745      | 0.0702  |
| 2      | 1.578         | BB   | 0.0734      | 379.87283    | 77.19826     | 1.7069  |
| 3      | 2.049         | BB   | 0.0912      | 2.12289e4    | 3738.49683   | 95.3879 |
| 4      | 2.515         | BB   | 0.0900      | 599.76508    | 102.93907    | 2.6949  |
| 5      | 2.918         | BB   | 0.1040      | 11.98579     | 1.72714      | 0.0539  |
| 6      | 4.619         | BB   | 0.1648      | 19.18929     | 1.83861      | 0.0862  |

Totals : 2.22553e4 3928.07736

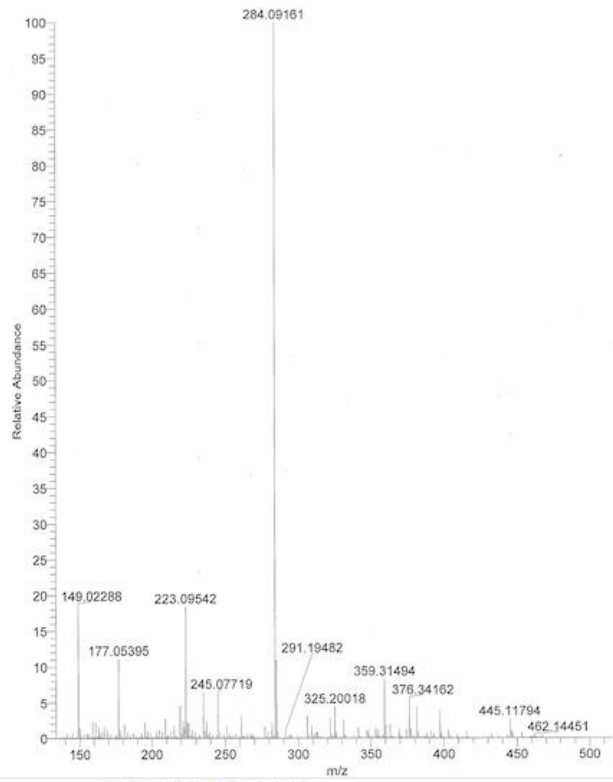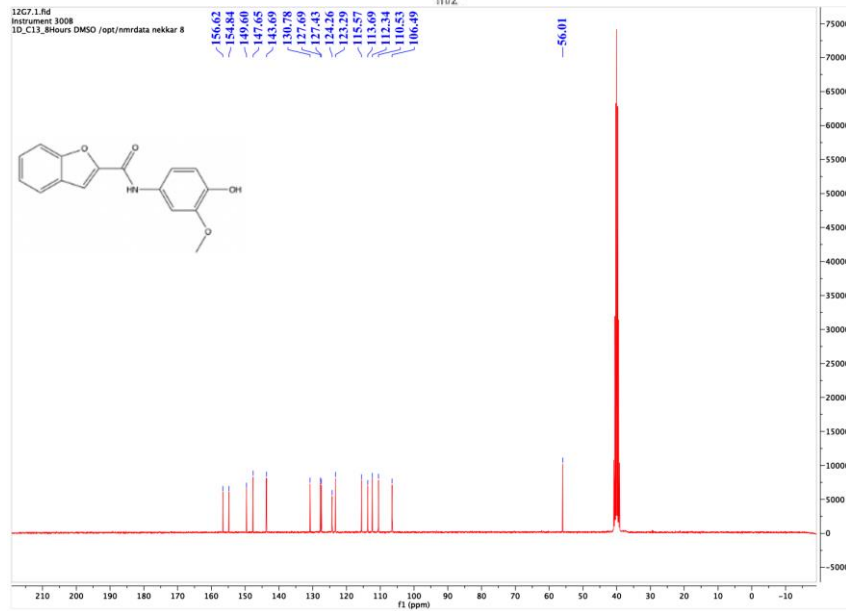

### 3. Analytical data for *N*-(3,4-dimethoxyphenyl)benzofuran-2-carboxamide (4c)

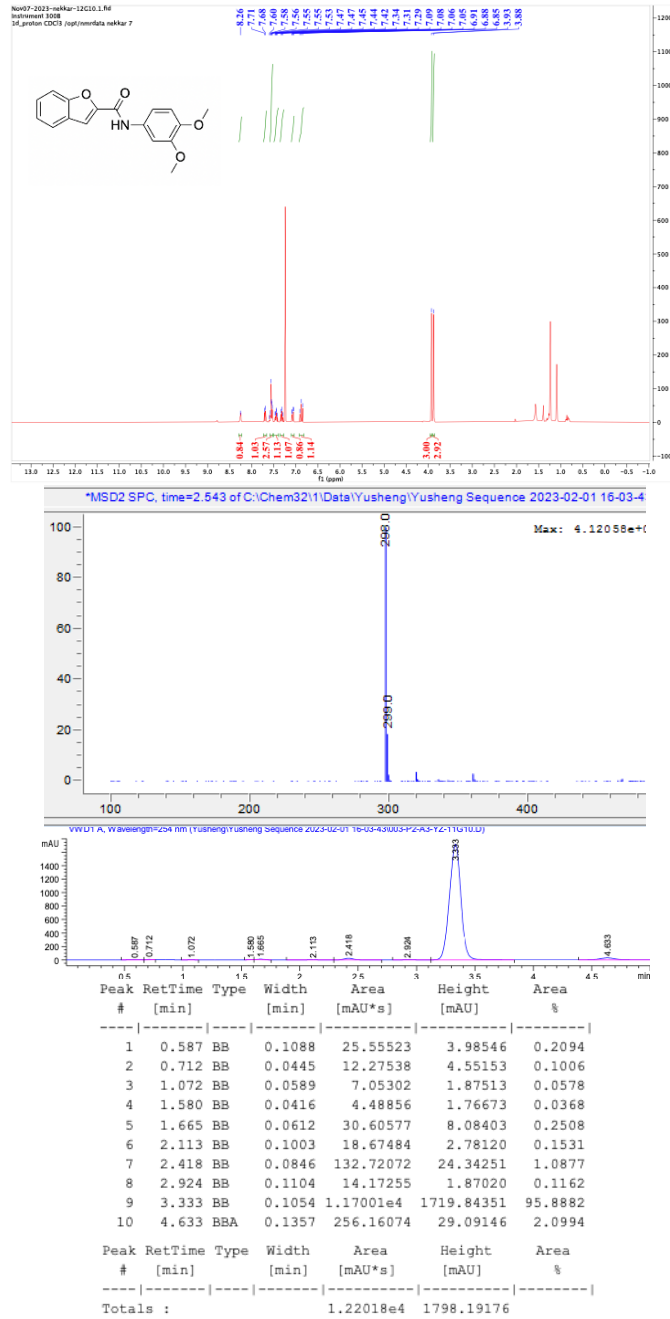



#### 4. Analytical data for *N*-(4-methoxyphenyl)benzofuran-2-carboxamide (4d)

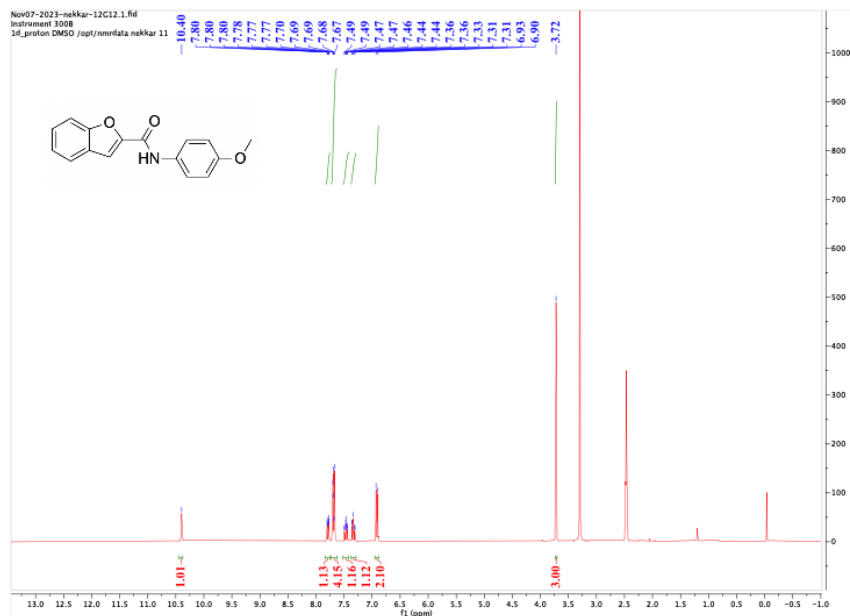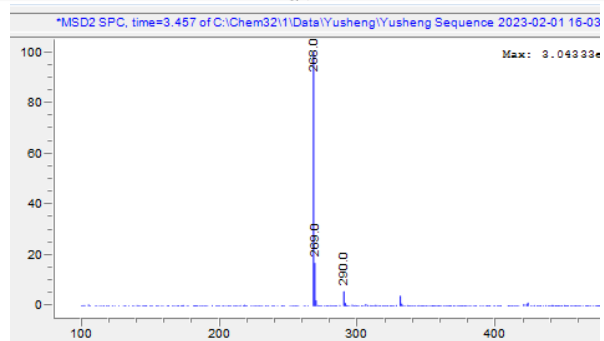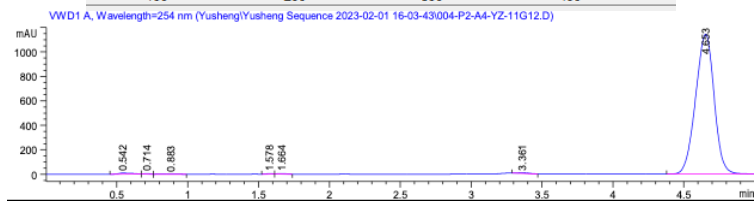

| Peak # | RetTime [min] | Type | Width [min] | Area [mAU*s] | Height [mAU] | Area %  |
|--------|---------------|------|-------------|--------------|--------------|---------|
| 1      | 0.542         | BB   | 0.0863      | 59.07301     | 9.15759      | 0.5616  |
| 2      | 0.714         | BB   | 0.0387      | 9.52620      | 4.00770      | 0.0906  |
| 3      | 0.883         | BB   | 0.0954      | 15.68039     | 2.22070      | 0.1491  |
| 4      | 1.578         | BB   | 0.0453      | 5.91851      | 2.13864      | 0.0563  |
| 5      | 1.664         | BB   | 0.0581      | 12.74531     | 3.52930      | 0.1212  |
| 6      | 3.361         | BB   | 0.0868      | 30.76379     | 5.71166      | 0.2925  |
| 7      | 4.653         | BBA  | 0.1420      | 1.03850e4    | 1142.70837   | 98.7289 |

Totals : 1.05187e4 1169.47398

## 5. Analytical data for *N*-(3-hydroxy-4-methoxyphenyl)benzo[*b*]thiophene-2-carboxamide

(5a)

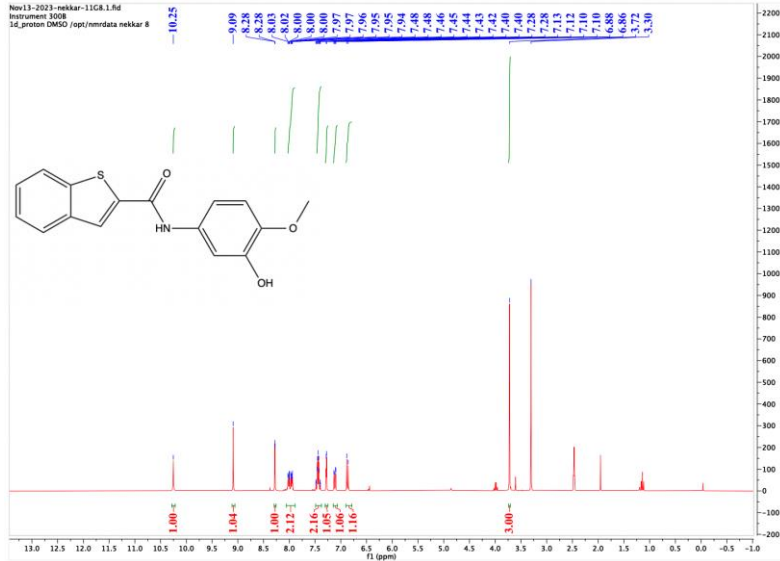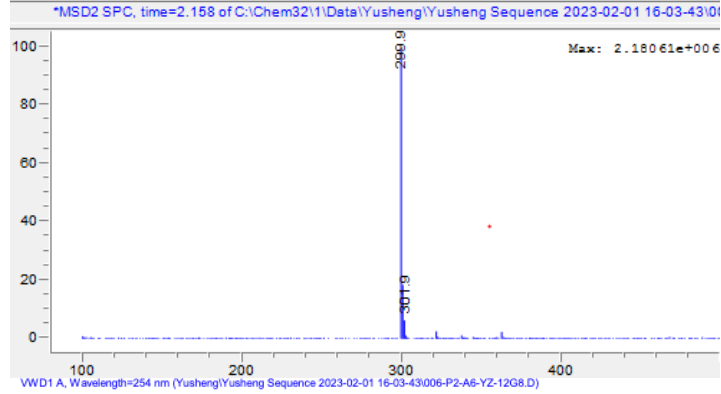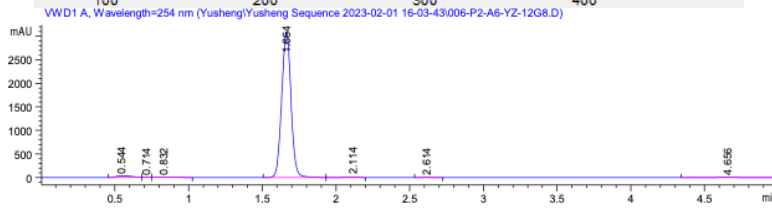

| Peak # | RetTime [min] | Type | Width [min] | Area [mAU*s] | Height [mAU] | Area %  |
|--------|---------------|------|-------------|--------------|--------------|---------|
| 1      | 0.544         | BB   | 0.0924      | 244.85555    | 36.88563     | 1.7449  |
| 2      | 0.714         | BB   | 0.0345      | 4.53921      | 2.16488      | 0.0323  |
| 3      | 0.832         | BB   | 0.1312      | 54.95166     | 6.46300      | 0.3916  |
| 4      | 1.664         | BB   | 0.0684      | 1.36022e4    | 3089.33960   | 96.9346 |
| 5      | 2.114         | BB   | 0.0751      | 45.44403     | 9.45236      | 0.3239  |
| 6      | 2.614         | BB   | 0.0778      | 15.67872     | 3.22137      | 0.1117  |
| 7      | 4.656         | BBA  | 0.1379      | 64.68129     | 7.26115      | 0.4609  |

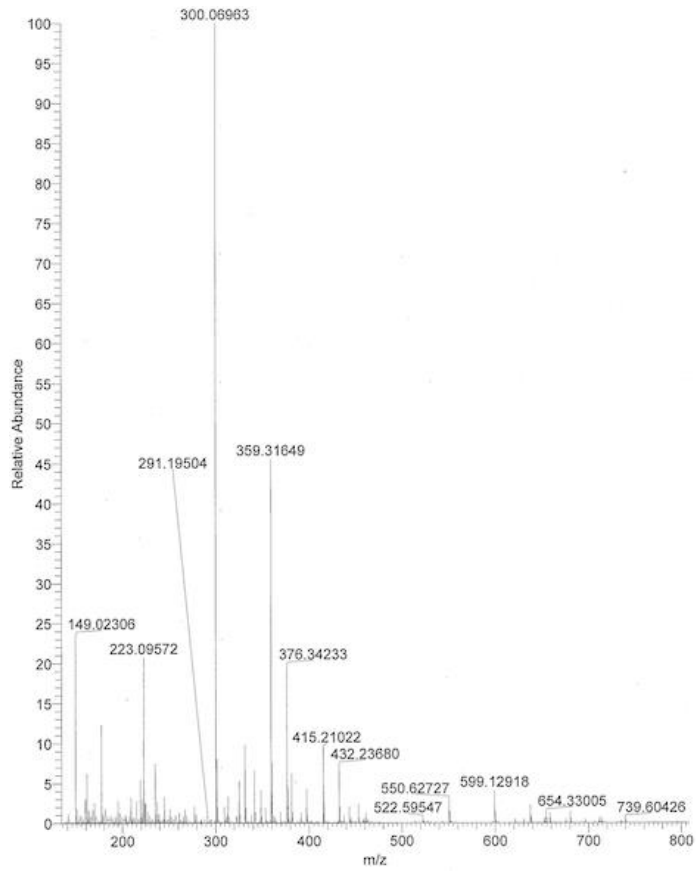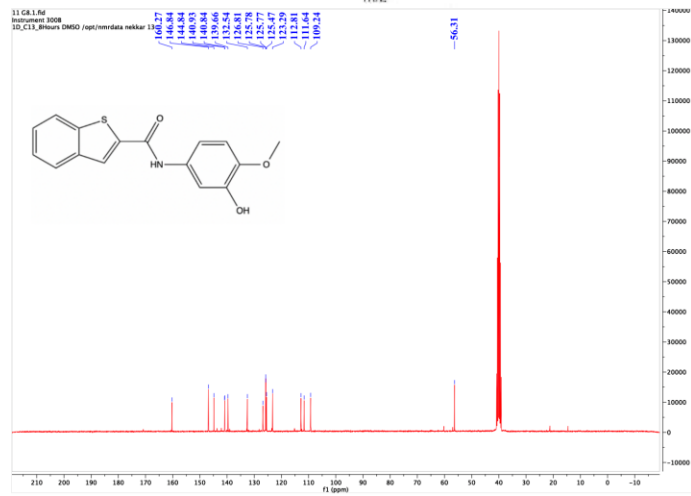

## 6. Analytical data for *N*-(4-hydroxy-3-methoxyphenyl)benzo[*b*]thiophene-2-carboxamide (5b)

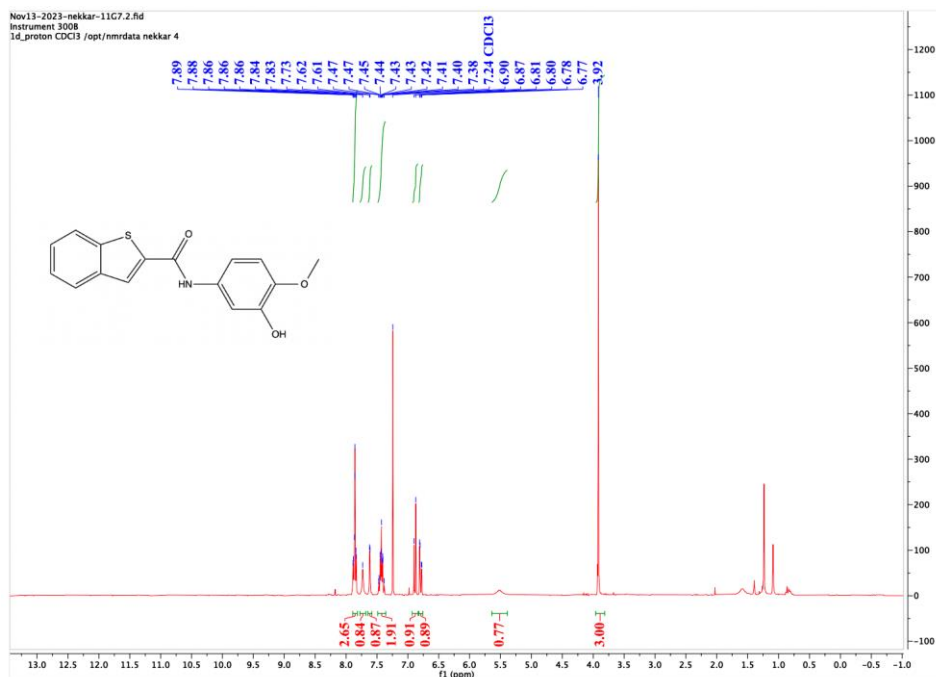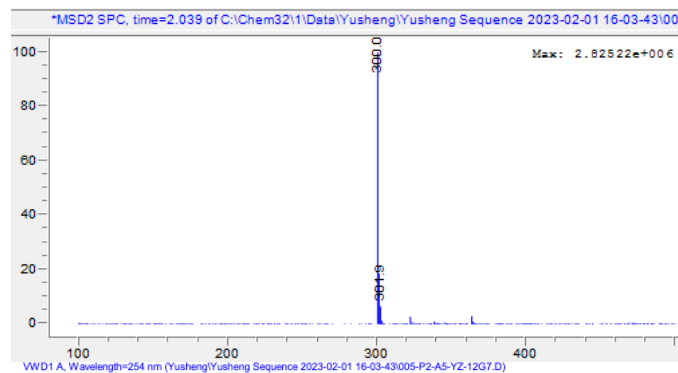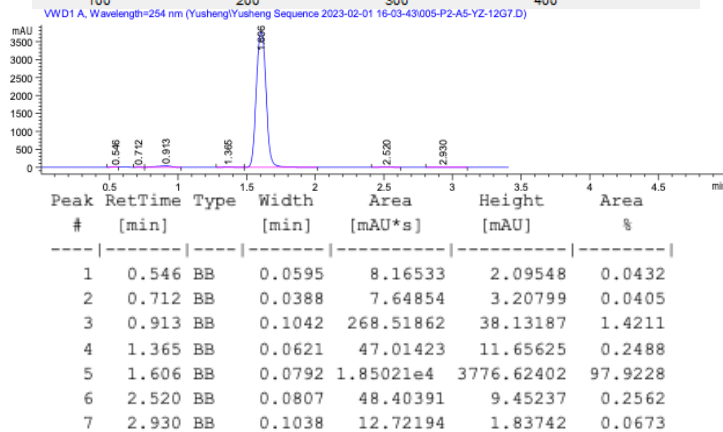

Totals : 1.88946e4 3843.00540

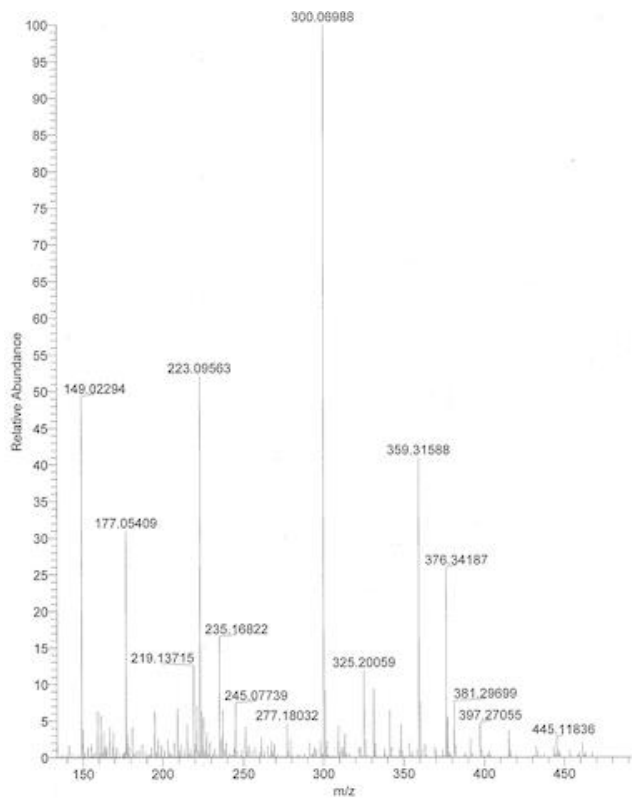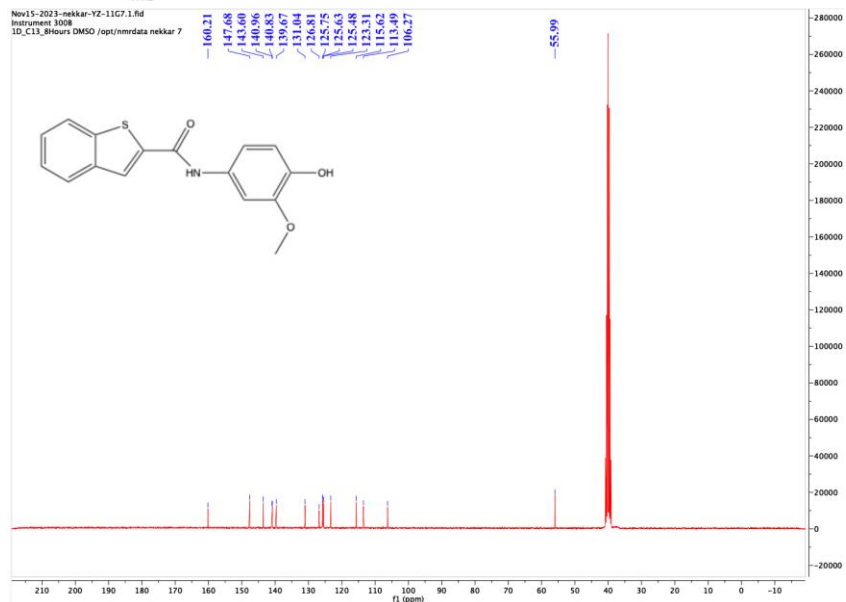

## 7. Analytical data for *N*-(3,4-dimethoxyphenyl)benzo[*b*]thiophene-2-carboxamide (5c)

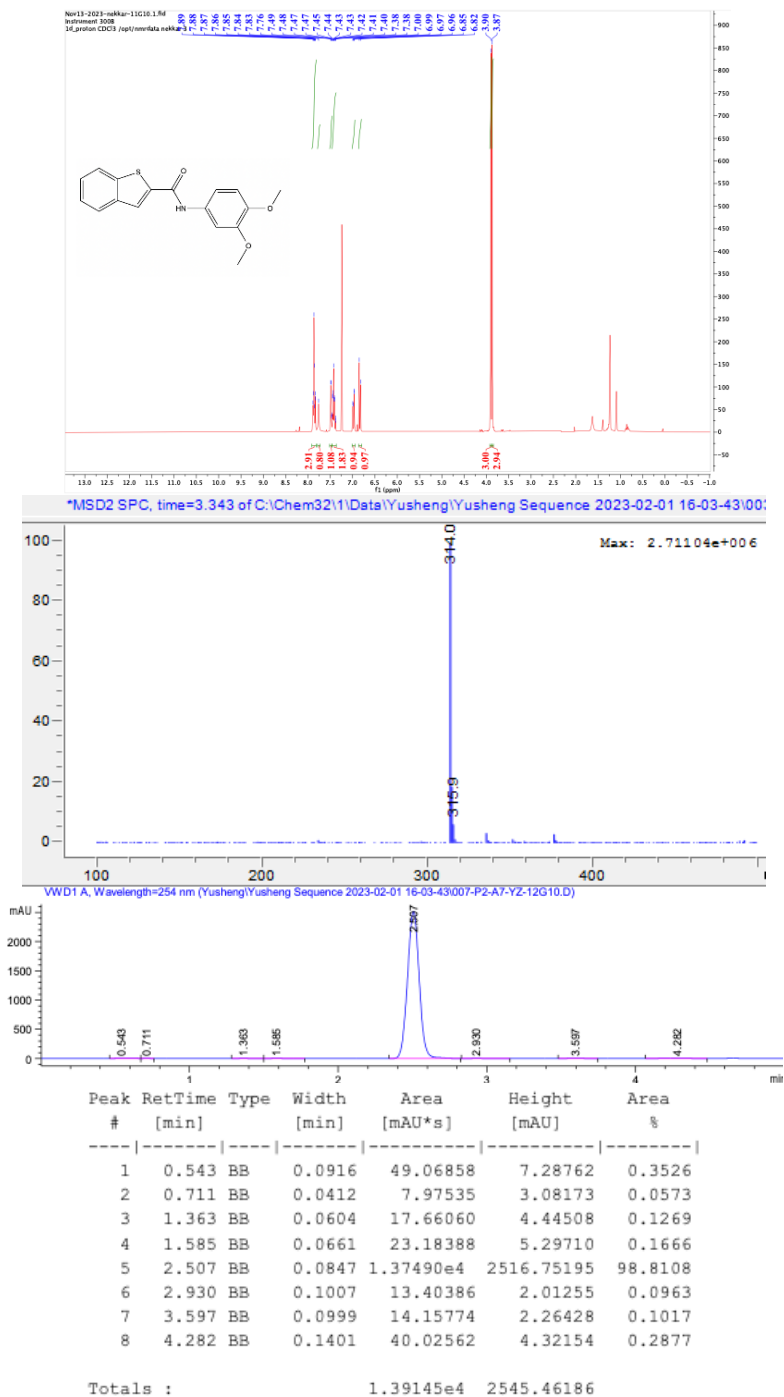

## 8. Analytical data for *N*-(4-methoxyphenyl)benzo[*b*]thiophene-2-carboxamide (5d)

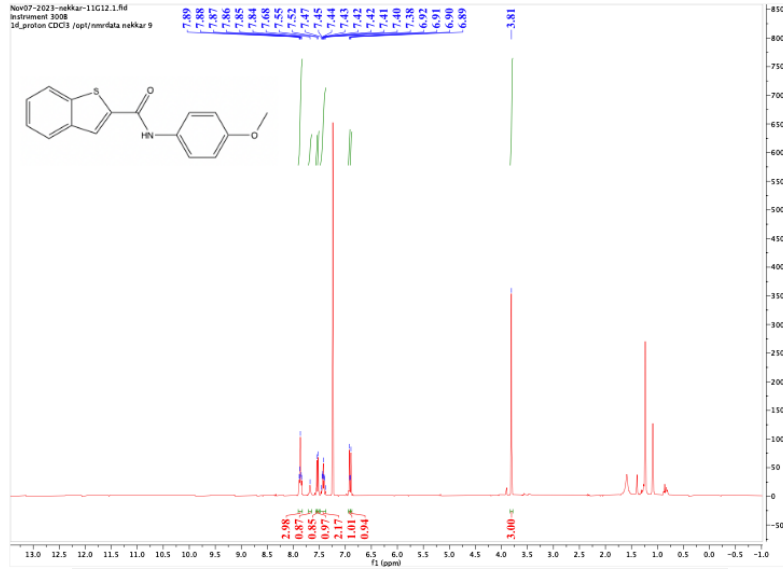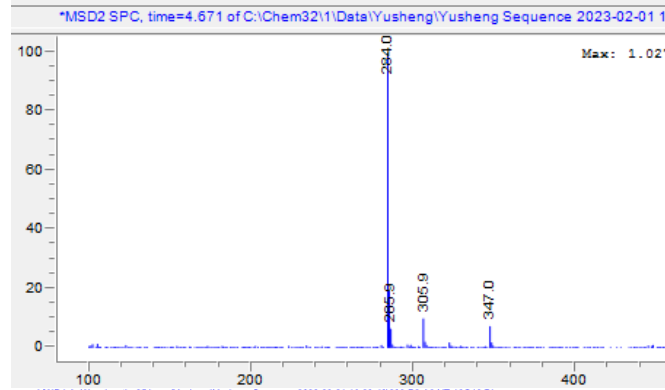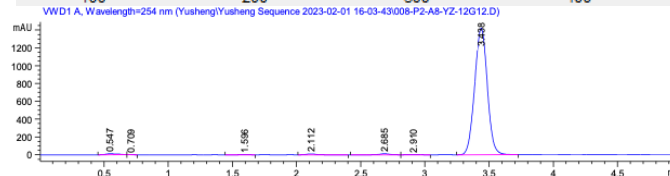

| Peak # | RetTime [min] | Type | Width [min] | Area [mAU*s] | Height [mAU] | Area %  |
|--------|---------------|------|-------------|--------------|--------------|---------|
| 1      | 0.547         | BB   | 0.0972      | 72.36466     | 10.52991     | 0.7274  |
| 2      | 0.709         | BB   | 0.0397      | 6.78568      | 2.75368      | 0.0682  |
| 3      | 1.596         | BB   | 0.0690      | 9.26006      | 2.11881      | 0.0931  |
| 4      | 2.112         | BB   | 0.0763      | 50.42281     | 10.26890     | 0.5068  |
| 5      | 2.685         | BB   | 0.0827      | 62.03573     | 11.54520     | 0.6235  |
| 6      | 2.910         | BB   | 0.0863      | 13.47597     | 2.48512      | 0.1354  |
| 7      | 3.438         | BB   | 0.1069      | 9734.72559   | 1421.36951   | 97.8456 |

## 9. ThT-based aggregation kinetics background readings

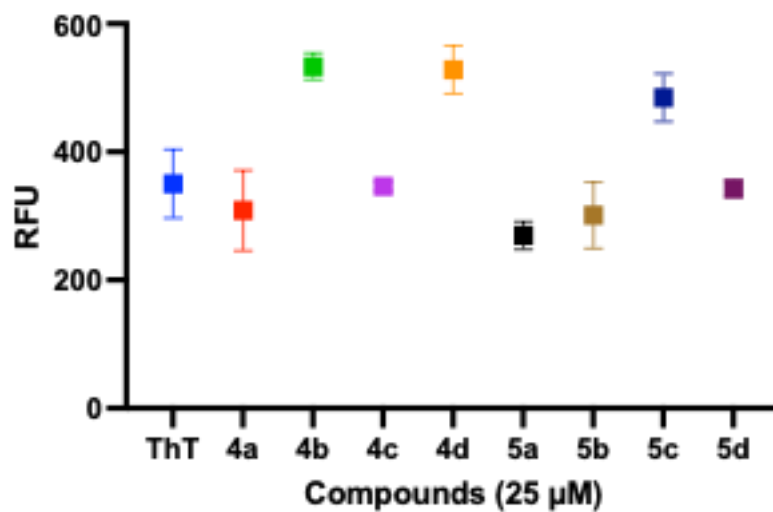

**Figure S9.** Background readings of compounds 4a–d and 5a–d (25 μM each), with ThT in the absence of Aβ<sub>42</sub> at 37 °C in phosphate buffer after 24 h incubation. Aggregation kinetics were monitored by ThT at 440 nm excitation and 490 nm emission. Results are averages of three independent experiments in triplicate measurements.



## 10. Effect of compounds 4a–d and 5a–d on preformed A $\beta$ 42 aggregates

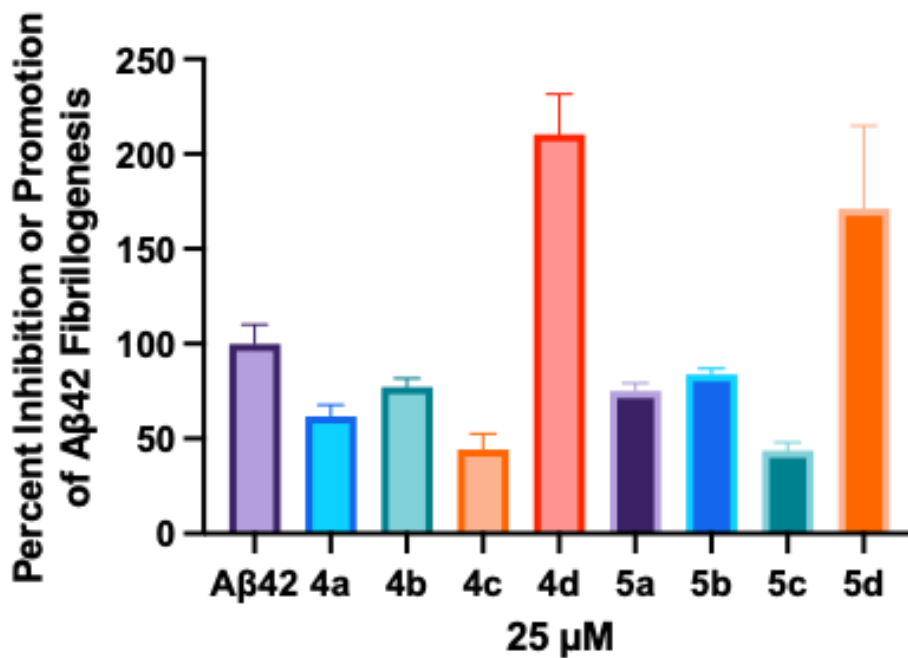

**Figure S10.** The effect of compounds 4a–d and 5a–d (25  $\mu$ M each) on preformed A $\beta$ 42 (10  $\mu$ M), was determined using ThT fluorescence at 37  $^{\circ}$ C in phosphate buffer after 24 h incubation. Aggregation kinetics were monitored by ThT (440 nm excitation and 490 nm emission). Results are averages of two independent experiments (n = 3).

## 11. Congo red UV assay for compounds 4b, 4d, 5b, 5d and resveratrol (RVT)

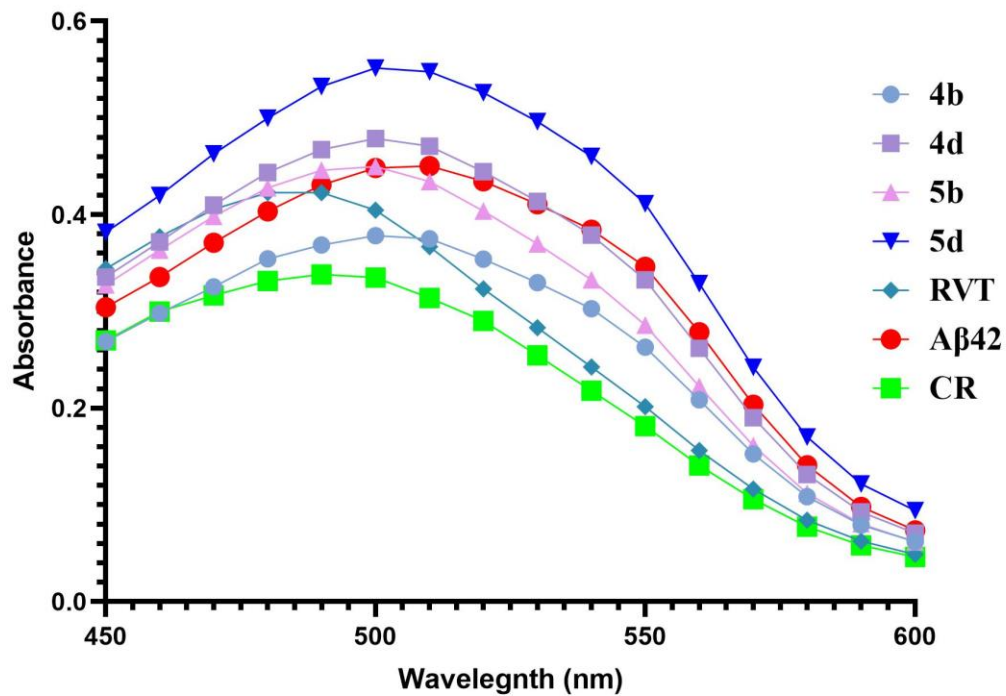

**Figure S11.** CR-assay curve of Aβ42 (20 μM) in the presence and absence of **4b**, **4d**, **5b**, **5d** and RVT at 25 μM. The CR assay absorbance was measured by UV scanning from 450– 600 nm after 24 h incubation at 37 °C. Results are averages of two independent experiments (n = 3).

**12. Table S1. Physicochemical properties of 4a–d and 5a–d calculated using the web tool SwissADME**

---

| <b>Compd</b> | <b>Molecular Weight</b> | <b>No. of H-Bond Acceptors</b> | <b>Donors</b> | <b>Number of Rotatable Bonds</b> | <b>Polar Surface Area (TPSA) Å<sup>2</sup></b> | <b>Consensus Log P</b> | <b>BBB Perm.</b> |
|--------------|-------------------------|--------------------------------|---------------|----------------------------------|------------------------------------------------|------------------------|------------------|
| <b>4a</b>    | 283.28                  | 4                              | 2             | 4                                | 71.70                                          | 2.54                   | Yes              |
| <b>4b</b>    | 283.28                  | 4                              | 2             | 4                                | 71.70                                          | 2.50                   | Yes              |
| <b>4c</b>    | 297.31                  | 4                              | 1             | 5                                | 60.70                                          | 2.88                   | Yes              |
| <b>4d</b>    | 267.28                  | 3                              | 1             | 4                                | 51.47                                          | 2.94                   | Yes              |
| <b>5a</b>    | 299.34                  | 3                              | 2             | 4                                | 86.80                                          | 3.26                   | Yes              |
| <b>5b</b>    | 299.34                  | 3                              | 2             | 4                                | 86.80                                          | 3.29                   | Yes              |
| <b>5c</b>    | 313.37                  | 3                              | 1             | 5                                | 75.80                                          | 3.62                   | Yes              |
| <b>5d</b>    | 283.35                  | 2                              | 1             | 4                                | 66.57                                          | 3.61                   | Yes              |

---
